# Supplementary material for: Transfection with GLS2 Glutaminase (GAB) Sensitizes Human Glioblastoma Cell Lines to Oxidative Stress by a Common Mechanism Involving Suppression of the PI3K/AKT Pathway
Source: MDPI journal article supplement (doi:10.3390/cancers11010115), 2019-01-19
Supplement: s1 [file s1]

# Supplementary Materials: Transfection with GLS2 Glutaminase (GAB) Sensitizes Human Glioblastoma Cell Lines to Oxidative Stress by a Common Mechanism Involving Suppression of the PI3K/AKT Pathway

Ewelina Majewska, Javier Márquez, Jan Albrecht and Monika Szeliga

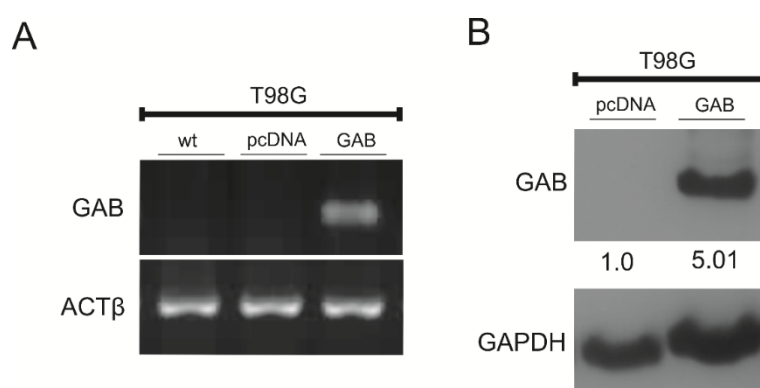

**Figure S1.** Analysis of GAB level in T98G cells wild-type (wt) or stably transfected with an empty pcDNA3 vector (pcDNA) or a pcDNA3 vector carrying GAB sequence (GAB). **(A)** GAB and ACTβ transcripts were determined by RT-PCR. **(B)** Protein levels of GAB and GAPDH in whole-cell lysates were determined by Western blot analysis. Rabbit anti-GLS2 antibody detecting both isoforms arising from GLS2 gene was used.

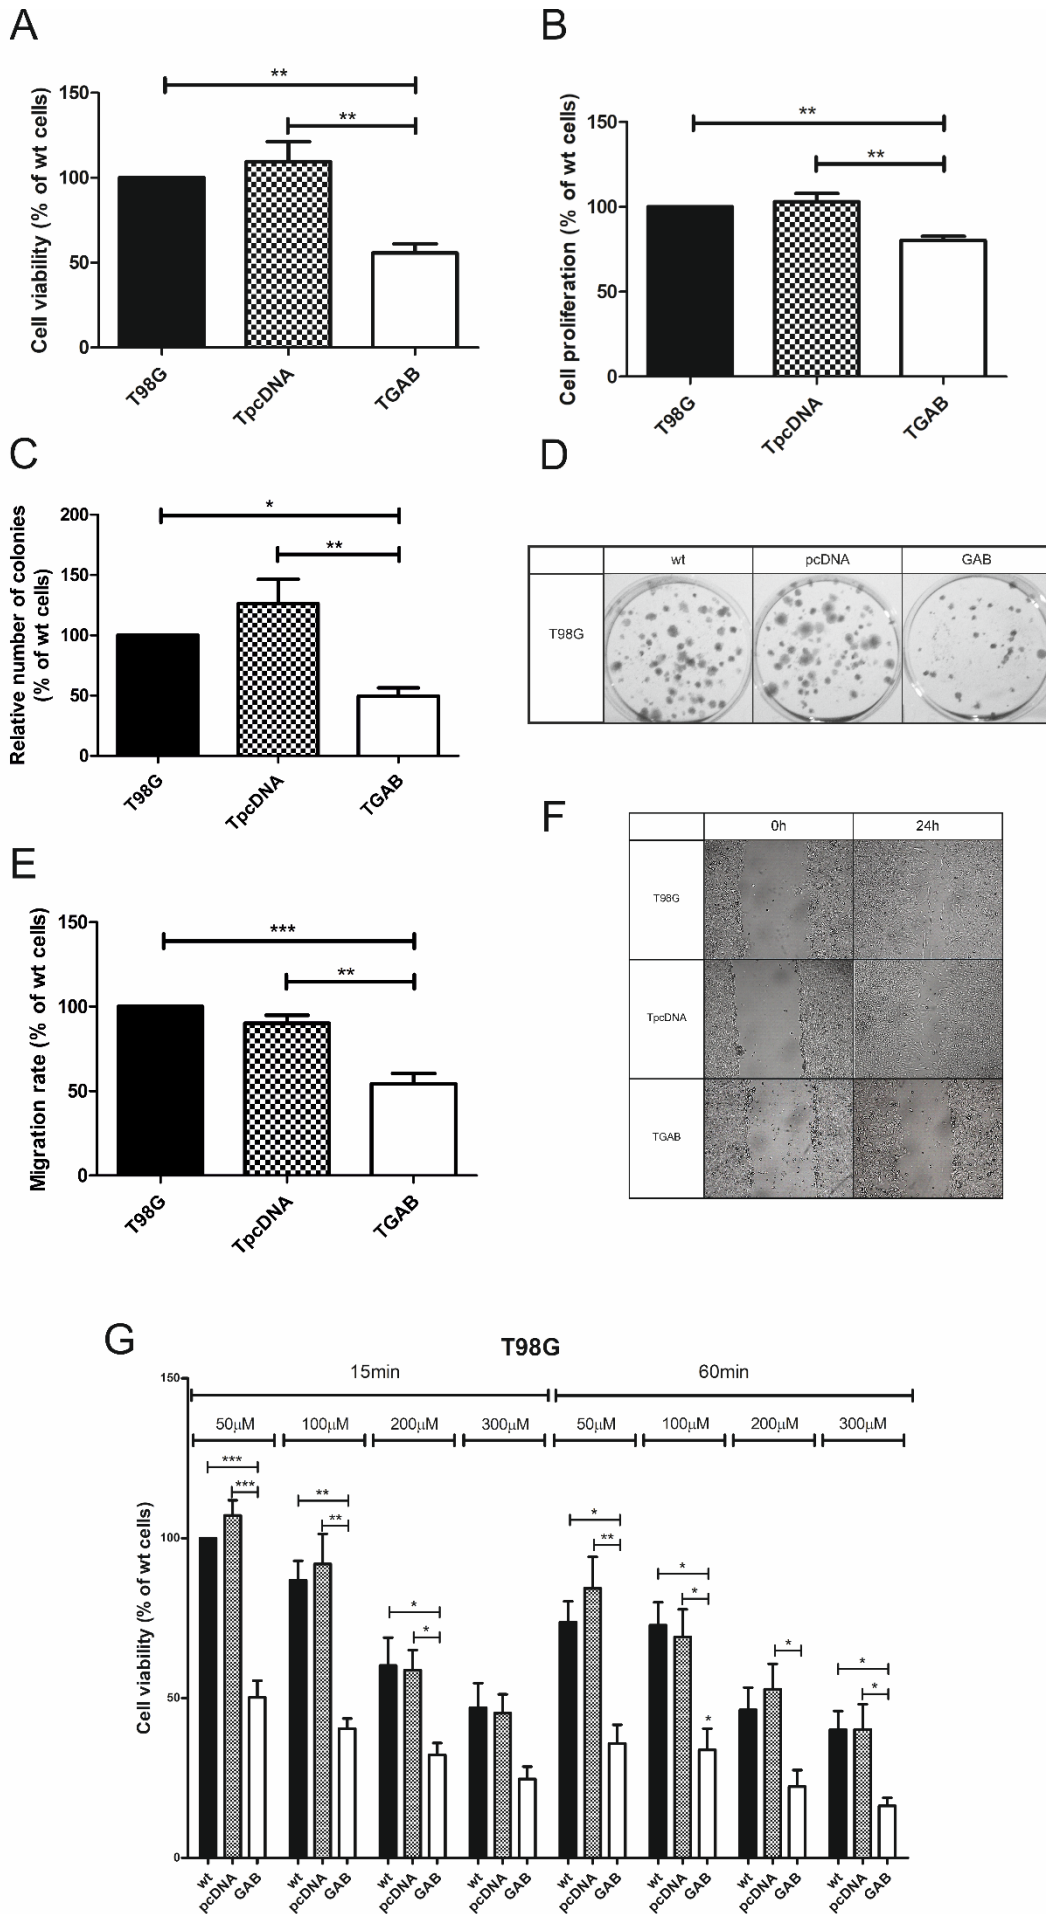

**Figure S2.** Transfection with GAB sequence reduces viability, proliferation, ability to form colonies and ability to migrate of T98G cells and enhances their sensitivity to H<sub>2</sub>O<sub>2</sub>. **(A)** Mitochondrial activity of wild type (wt) cells or cells stably transfected with the indicated plasmids was assessed by the MTT test 48 h after seeding. Results are mean ± SD (*n* = 4) expressed as a percentage of wt cells. \*\* *p* < 0.01 versus wt and pcDNA cells (one-way ANOVA followed by Tukey's test). **(B)** Cell proliferation of wt cells or cells stably transfected with the indicated plasmids was assessed by the BrdU assay 48 h after seeding. Results are mean ± SD (*n* = 4) expressed as a percentage of wt cells. \* *p* < 0.05, \*\* *p* < 0.01 versus wt and pcDNA (one-way ANOVA followed by Tukey's test). **(C)** Colony formation 3 weeks after seeding. Number of colonies are represented as a percentage relative to the number of colonies formed by wt cells. Results are mean ± SD (*n* = 4). \* *p* < 0.05, \*\* *p* < 0.01 versus wt and pcDNA cells (one-way ANOVA followed by Tukey's test). **(D)** Representative images of the plates with colonies formed within 3 weeks of growth. **(E)** The migration rate of wt cells or cells stably transfected with the indicated plasmids was measured by the wound-healing. Twenty four hours after seeding, the confluent cells were scratch-wounded with a micropipette tip. Wound borders were recorded and measured at 0 and 24 h post-scratching. Results are mean ± SD (*n* = 3) expressed as a percentage of the scratch gap observed for wt cells. \*\* *p* < 0.01, \*\*\* *p* < 0.001 versus wt and pcDNA cells (one-way ANOVA followed by Tukey's test). **(F)** Representative images of scratch gaps taken at 0 and 24 h after scratching. Magnification : objective 4x and digital 10x. **(G)** Transfection with GAB sequence sensitizes T98G cells to treatment with H<sub>2</sub>O<sub>2</sub>. Viability of wt cells or transfected with the indicated plasmids was measured by the MTT test treatment with 50–300 μM H<sub>2</sub>O<sub>2</sub> for 15 min and 1 h. Results are mean ± SD (*n* = 4) expressed as a percentage of wt cells treated with 5 μM H<sub>2</sub>O<sub>2</sub> for 15 min. \* *p* < 0.05, \*\* *p* < 0.01, \*\*\* *p* < 0.001 versus wt and pcDNA (one-way ANOVA followed by Tukey's test).

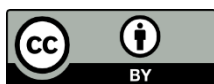

© 2019 by the authors. Licensee MDPI, Basel, Switzerland. This article is an open access article distributed under the terms and conditions of the Creative Commons Attribution (CC BY) license (<http://creativecommons.org/licenses/by/4.0/>).
